# Supplementary material for: Na–Ga–Si type-I clathrate single crystals grown via Na evaporation using Na–Ga and Na–Ga–Sn fluxes
Source: Royal Society of Chemistry journal article supplement (doi:10.1039/c8ra07971d), 2018-01-01
Supplement: c8ra07971d1.pdf [file c8ra07971d1.pdf]

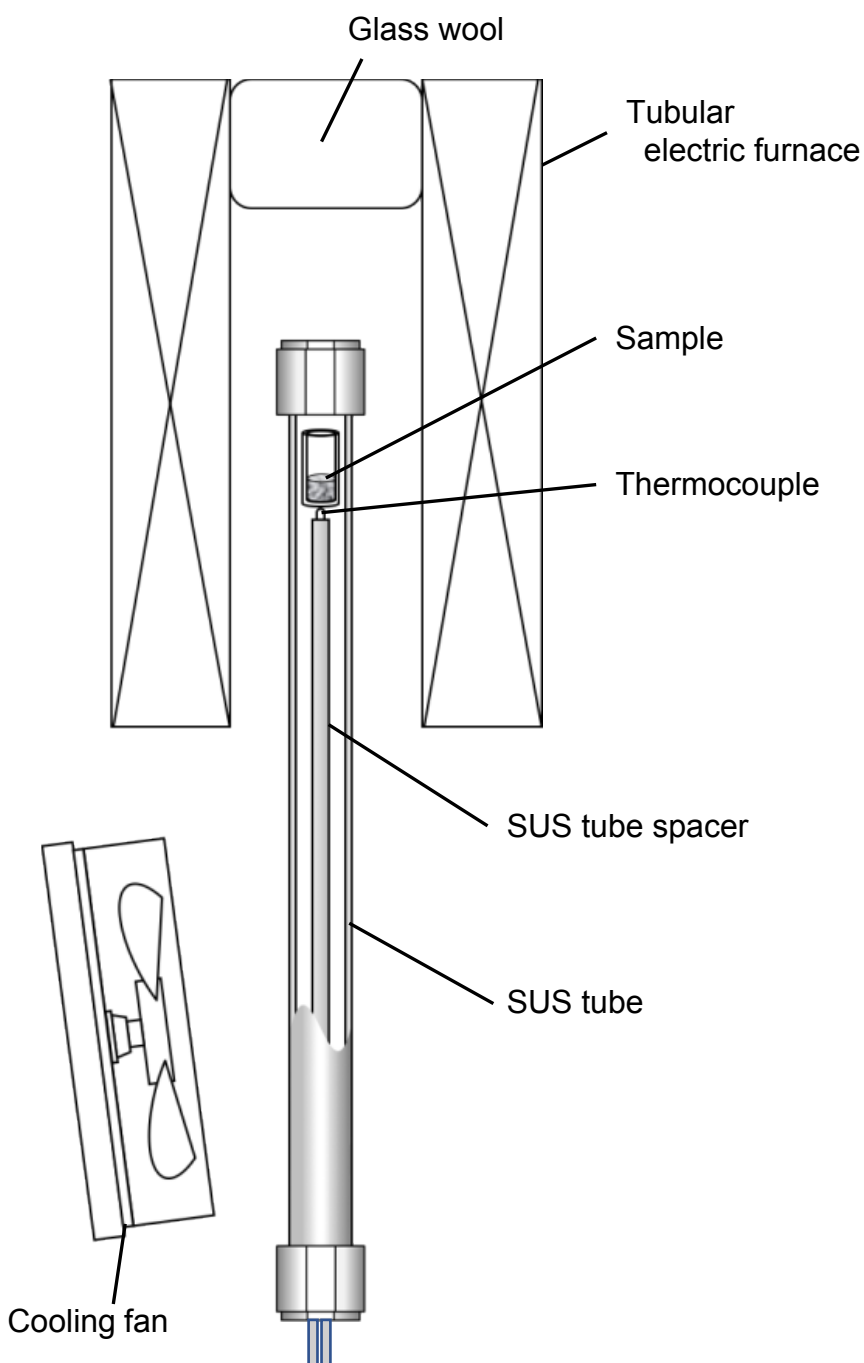

**Figure S1.** Schematic illustration of a stainless steel (SUS) container and a tubular electric furnace.

**Table S1** Atomic coordinates and isotropic and equivalent isotropic displacement parameter ( $U_{\text{eq}} / \text{\AA}^2$ ) for **Crystals 1–5**.

| atom                                                                    | site  | occupancy           | $x$        | $y$        | $z$        | $U_{\text{eq}}$ |
|-------------------------------------------------------------------------|-------|---------------------|------------|------------|------------|-----------------|
| <b>Crystal 1</b> ( $\text{Na}_8\text{Ga}_{5.70(7)}\text{Si}_{40.30}$ )  |       |                     |            |            |            |                 |
| Na1                                                                     | $6d$  | 1                   | 1/4        | 1/2        | 0          | 0.0678(7)       |
| Na2                                                                     | $2a$  | 1                   | 0          | 0          | 0          | 0.0235(6)       |
| Si/Ga1                                                                  | $24k$ | 0.945 / 0.055(2)    | 0          | 0.30544(4) | 0.11644(4) | 0.00831(16)     |
| Si2                                                                     | $16i$ | 1                   | 0.18400(3) | $x$        | $x$        | 0.0075(2)       |
| Si/Ga3                                                                  | $6c$  | 0.270 / 0.730(4)    | 1/4        | 0          | 1/2        | 0.00801(17)     |
| <b>Crystal 2</b> ( $\text{Na}_8\text{Ga}_{5.52(7)}\text{Si}_{40.48}$ )  |       |                     |            |            |            |                 |
| Na1                                                                     | $6d$  | 1                   | 1/4        | 1/2        | 0          | 0.0664(7)       |
| Na2                                                                     | $2a$  | 1                   | 0          | 0          | 0          | 0.0238(6)       |
| Si/Ga1                                                                  | $24k$ | 0.947 / 0.053(2)    | 0          | 0.30552(4) | 0.11645(4) | 0.00861(16)     |
| Si2                                                                     | $16i$ | 1                   | 0.18405(3) | $x$        | $x$        | 0.0081(2)       |
| Si/Ga3                                                                  | $6c$  | 0.292 / 0.708(4)    | 1/4        | 0          | 1/2        | 0.00852(17)     |
| <b>Crystal 3</b> ( $\text{Na}_8\text{Ga}_{5.39(11)}\text{Si}_{40.61}$ ) |       |                     |            |            |            |                 |
| Na1                                                                     | $6d$  | 1                   | 1/4        | 1/2        | 0          | 0.0662(10)      |
| Na2                                                                     | $2a$  | 1                   | 0          | 0          | 0          | 0.0238(9)       |
| Si/Ga1                                                                  | $24k$ | 0.947 / 0.053(3)    | 0          | 0.30560(5) | 0.11650(5) | 0.0092(2)       |
| Si2                                                                     | $16i$ | 1                   | 0.18407(4) | $x$        | $x$        | 0.0086(3)       |
| Si/Ga3                                                                  | $6c$  | 0.315 / 0.685(6)    | 1/4        | 0          | 1/2        | 0.0090(2)       |
| <b>Crystal 4</b> ( $\text{Na}_8\text{Ga}_{5.06(7)}\text{Si}_{40.94}$ )  |       |                     |            |            |            |                 |
| Na1                                                                     | $6d$  | 1                   | 1/4        | 1/2        | 0          | 0.0636(6)       |
| Na2                                                                     | $2a$  | 1                   | 0          | 0          | 0          | 0.0236(5)       |
| Si/Ga1                                                                  | $24k$ | 0.955 / 0.045(2)    | 0          | 0.30566(3) | 0.11651(3) | 0.00825(15)     |
| Si2                                                                     | $16i$ | 1                   | 0.18407(2) | $x$        | $x$        | 0.00793(18)     |
| Si/Ga3                                                                  | $6c$  | 0.336 / 0.664(4)    | 1/4        | 0          | 1/2        | 0.00809(16)     |
| <b>Crystal 5</b> ( $\text{Na}_8\text{Ga}_{4.94(6)}\text{Si}_{41.06}$ )  |       |                     |            |            |            |                 |
| Na1                                                                     | $6d$  | 1                   | 1/4        | 1/2        | 0          | 0.0619(6)       |
| Na2                                                                     | $2a$  | 1                   | 0          | 0          | 0          | 0.0229(5)       |
| Si/Ga1                                                                  | $24k$ | 0.9561 / 0.0439(18) | 0          | 0.30573(3) | 0.11652(3) | 0.00825(14)     |
| Si2                                                                     | $16i$ | 1                   | 0.18408(2) | $x$        | $x$        | 0.00778(17)     |
| Si/Ga3                                                                  | $6c$  | 0.352 / 0.648(3)    | 1/4        | 0          | 1/2        | 0.00807(15)     |

**Table S2** Atomic coordinates and isotropic and equivalent isotropic displacement parameter ( $U_{ij} / \text{\AA}^2$ ) for **Crystals 1–5**.

| atom                                                                    | $U_{11}$    | $U_{22}$    | $U_{33}$    | $U_{23}$     | $U_{13}$   | $U_{12}$   |
|-------------------------------------------------------------------------|-------------|-------------|-------------|--------------|------------|------------|
| <b>Crystal 1</b> ( $\text{Na}_8\text{Ga}_{5.70(7)}\text{Si}_{40.30}$ )  |             |             |             |              |            |            |
| Na1                                                                     | 0.0459(13)  | 0.0787(11)  | $= U_{22}$  | 0            | 0          | 0          |
| Na2                                                                     | 0.0235(6)   | $= U_{11}$  | $= U_{11}$  | 0            | 0          | 0          |
| Si / Ga1                                                                | 0.0083(2)   | 0.0090(2)   | 0.0077(2)   | -0.00011(14) | 0          | 0          |
| Si2                                                                     | 0.0075(2)   | $= U_{11}$  | $= U_{11}$  | -0.00038(10) | $= U_{23}$ | $= U_{23}$ |
| Si / Ga3                                                                | 0.0089(2)   | 0.00757(18) | $= U_{22}$  | 0            | 0          | 0          |
| <b>Crystal 2</b> ( $\text{Na}_8\text{Ga}_{5.52(7)}\text{Si}_{40.48}$ )  |             |             |             |              |            |            |
| Na1                                                                     | 0.0462(14)  | 0.0765(11)  | $= U_{22}$  | 0            | 0          | 0          |
| Na2                                                                     | 0.0238(6)   | $= U_{11}$  | $= U_{11}$  | 0            | 0          | 0          |
| Si1 / Ga1                                                               | 0.0086(2)   | 0.0091(2)   | 0.0082(2)   | -0.00014(12) | 0          | 0          |
| Si2                                                                     | 0.0081(2)   | $= U_{11}$  | $= U_{11}$  | -0.00031(9)  | $= U_{23}$ | $= U_{23}$ |
| Si3 / Ga3                                                               | 0.0096(2)   | 0.00799(19) | $= U_{22}$  | 0            | 0          | 0          |
| <b>Crystal 3</b> ( $\text{Na}_8\text{Ga}_{5.39(11)}\text{Si}_{40.61}$ ) |             |             |             |              |            |            |
| Na1                                                                     | 0.046(2)    | 0.0765(16)  | $= U_{22}$  | 0            | 0          | 0          |
| Na2                                                                     | 0.0238(9)   | $= U_{11}$  | $= U_{11}$  | 0            | 0          | 0          |
| Si1 / Ga1                                                               | 0.0091(3)   | 0.0098(3)   | 0.0087(3)   | 0.0000(2)    | 0          | 0          |
| Si2                                                                     | 0.0086(3)   | $= U_{11}$  | $= U_{11}$  | -0.00044(15) | $= U_{23}$ | $= U_{23}$ |
| Si3 / Ga3                                                               | 0.0097(4)   | 0.0087(3)   | $= U_{22}$  | 0            | 0          | 0          |
| <b>Crystal 4</b> ( $\text{Na}_8\text{Ga}_{5.06(7)}\text{Si}_{40.94}$ )  |             |             |             |              |            |            |
| Na1                                                                     | 0.0451(12)  | 0.0728(9)   | $= U_{22}$  | 0            | 0          | 0          |
| Na2                                                                     | 0.0236(5)   | $= U_{11}$  | $= U_{11}$  | 0            | 0          | 0          |
| Si1 / Ga1                                                               | 0.0081(2)   | 0.0087(2)   | 0.0079(2)   | -0.00022(12) | 0          | 0          |
| Si2                                                                     | 0.00793(18) | $= U_{11}$  | $= U_{11}$  | -0.00041(9)  | $= U_{23}$ | $= U_{23}$ |
| Si3 / Ga3                                                               | 0.0091(2)   | 0.00757(17) | $= U_{22}$  | 0            | 0          | 0          |
| <b>Crystal 5</b> ( $\text{Na}_8\text{Ga}_{4.94(6)}\text{Si}_{41.06}$ )  |             |             |             |              |            |            |
| Na1                                                                     | 0.0428(11)  | 0.0715(9)   | $= U_{22}$  | 0            | 0          | 0          |
| Na2                                                                     | 0.0229(5)   | $= U_{11}$  | $= U_{11}$  | 0            | 0          | 0          |
| Si / Ga1                                                                | 0.00813(19) | 0.00885(19) | 0.00776(19) | -0.00024(12) | 0          | 0          |
| Si2                                                                     | 0.00778(17) | $= U_{11}$  | $= U_{11}$  | -0.00035(9)  | $= U_{23}$ | $= U_{23}$ |
| Si / Ga3                                                                | 0.0089(2)   | 0.00768(16) | $= U_{22}$  | 0            | 0          | 0          |

**Table S3** Atomic distances (Å) for **Crystals 1–5**.

| crystal                    | 1                                                         | 2                                                         | 3                                                          | 4                                                         | 5                                                         |
|----------------------------|-----------------------------------------------------------|-----------------------------------------------------------|------------------------------------------------------------|-----------------------------------------------------------|-----------------------------------------------------------|
| composition                | Na <sub>8</sub> Ga <sub>5.70(7)</sub> Si <sub>40.30</sub> | Na <sub>8</sub> Ga <sub>5.52(7)</sub> Si <sub>40.48</sub> | Na <sub>8</sub> Ga <sub>5.39(11)</sub> Si <sub>40.61</sub> | Na <sub>8</sub> Ga <sub>5.06(7)</sub> Si <sub>40.94</sub> | Na <sub>8</sub> Ga <sub>4.94(6)</sub> Si <sub>41.06</sub> |
| [Si/Ga] <sub>24</sub> cage |                                                           |                                                           |                                                            |                                                           |                                                           |
| Na1-Si/Ga1                 | 3.4853(3)                                                 | 3.4830(3)                                                 | 3.4827(4)                                                  | 3.4783(2)                                                 | 3.4755(2)                                                 |
| Na1-Si2                    | 3.8371(4)                                                 | 3.8348(4)                                                 | 3.8347(5)                                                  | 3.8302(3)                                                 | 3.8275(3)                                                 |
| Na1-Si/Ga3                 | 3.6510(1)                                                 | 3.6490(1)                                                 | 3.6490(1)                                                  | 3.6448(1)                                                 | 3.6423(1)                                                 |
| Si/Ga1-Si/Ga1              | 2.4049(7)                                                 | 2.4037(8)                                                 | 2.4048(11)                                                 | 2.4022(7)                                                 | 2.4007(6)                                                 |
| Si/Ga1-Si2                 | 2.3811(3)                                                 | 2.3805(3)                                                 | 2.3809(4)                                                  | 2.3785(2)                                                 | 2.3772(2)                                                 |
| Si/Ga1-Si/Ga3              | 2.4370(4)                                                 | 2.4350(4)                                                 | 2.4339(6)                                                  | 2.4306(3)                                                 | 2.4283(3)                                                 |
| Si2-Si2                    | 2.3610(10)                                                | 2.3580(10)                                                | 2.3575(15)                                                 | 2.3544(9)                                                 | 2.3526(8)                                                 |
| Si-Si ave.                 | 2.4001(5)                                                 | 2.3987(5)                                                 | 2.3986(7)                                                  | 2.3958(4)                                                 | 2.3941(3)                                                 |
| [Si/Ga] <sub>20</sub> cage |                                                           |                                                           |                                                            |                                                           |                                                           |
| Na2-Si/Ga1                 | 3.3756(4)                                                 | 3.3745(4)                                                 | 3.3756(6)                                                  | 3.3722(3)                                                 | 3.3706(3)                                                 |
| Na2-Si2                    | 3.2910(5)                                                 | 3.2901(5)                                                 | 3.2904(7)                                                  | 3.2867(4)                                                 | 3.2846(4)                                                 |
| Si/Ga1-Si/Ga1              | 2.4049(7)                                                 | 2.4037(8)                                                 | 2.4048(11)                                                 | 2.4022(7)                                                 | 2.4007(6)                                                 |
| Si/Ga1-Si2                 | 2.3811(3)                                                 | 2.3805(3)                                                 | 2.3809(4)                                                  | 2.3785(2)                                                 | 2.3772(2)                                                 |
| Si-Si ave.                 | 2.3859(4)                                                 | 2.3851(4)                                                 | 2.3857(5)                                                  | 2.3832(3)                                                 | 2.3819(3)                                                 |
